# Supplementary material for: Network Analysis of Metabolome and Transcriptome Revealed Regulation of Different Nitrogen Concentrations on Hybrid Poplar Cambium Development
Source: MDPI journal article supplement (doi:10.3390/ijms25021017), 2024-01-13
Supplement: s1 [file s1]

**Table S3 Primer sequences for qRT-PCR analysis.**

| <b>Locus name (POPTR)</b>    | <b>Primers<br/>(5'-3')</b>   | <b>Product<br/>size (bp)</b> | <b>Annealing<br/>temp (°C)</b> |
|------------------------------|------------------------------|------------------------------|--------------------------------|
| Potri.002G044900             | F: GGCTGAAGGAGAGATGGTGAGG    | 192                          | 60                             |
|                              | R: ACTGGAGGCCATCCACAAC       |                              |                                |
| Potri.001G057400             | F: GAGAGAGGGGTTTCTTCCAAACTG  | 164                          | 60                             |
|                              | R: CCCTTATTCCCGCCATTGCT      |                              |                                |
| Potri.006G188000             | F: CACTGGAGCCCAAGCAACTACA    | 169                          | 60                             |
|                              | R: AATATCGGAGGGCTGCTTGTGG    |                              |                                |
| Potri.003G192600             | F: CTTGCCGAGGCATTCCAGT       | 184                          | 60                             |
|                              | R: GTGGTGCTGCATGTCCCACT      |                              |                                |
| Potri.006G021400             | F: CCCTTCATCCAAACGGGTCAGT    | 128                          | 60                             |
|                              | R: GCAAGAGCCCAAGCAACCTG      |                              |                                |
| Potri.008G038200             | F: ACGCCCTGATGAATGGTGAGA     | 171                          | 60                             |
|                              | R: ACCTGCATTCCGTGATCCTGT     |                              |                                |
| Potri.013G157900             | F: AGGGTTGAAGTGCGCCATAGA     | 103                          | 60                             |
|                              | R: TGCAGCGACGTTGATGTTCTC     |                              |                                |
| Potri.009G063100             | F: GGTGTCGGCCATGCATCCTA      | 150                          | 60                             |
|                              | R: CCTATGCAACTCCCACCACT      |                              |                                |
| Potri.018G015500             | F: GCGCATTCAGTGATCGGTTCC     | 195                          | 60                             |
|                              | R: TGTGGGCACTAGGTTTCGGT      |                              |                                |
| Potri.005G117500             | F: ACGCCCTTGATTTGGCTGTTG     | 166                          | 60                             |
|                              | R: TAAAATGGACAGACCACGCGT     |                              |                                |
| Potri.001G015132             | F: ATGGCTGAGGGTGTCAAGGTG     | 148                          | 60                             |
|                              | R: ACCGAGCTGAGAGTTTTGGGA     |                              |                                |
| Potri.003G112600             | F: GCCACAATCCTCCTGATGG       | 104                          | 60                             |
|                              | R: GGATCATCGTGGTCTGCTGG      |                              |                                |
| Potri.014G183800             | F: TAGCAGCAACCACCAACACCAT    | 117                          | 60                             |
|                              | R: CTTTGTGCTACCACTGCTGATGT   |                              |                                |
| Potri.015G127900             | F: ATTCGCAAGAGGGCAGGTGG      | 108                          | 60                             |
|                              | R: GAGCCGCGGTGGTGTATCTT      |                              |                                |
| Potri.002G023900             | F: TCCGGCACAAGATTGCTCA       | 151                          | 60                             |
|                              | R: AGTAAGGGGCTCTTTTCACTCA    |                              |                                |
| Potri.017G144700.1 (PtrUGP2) | F: GCTTGATAGTCTAAAGGTGGTCGGT | 156                          | 60                             |
|                              | R: TAGAGGTCCTCCGGGCCATT      |                              |                                |
| Potri.0005G22060.1 (PtrUBQ7) | F: GGAACGGGTTGAGGAGAAAGAAG   | 135                          | 60                             |
|                              | R: GCAAGAACAAGATGAAGCACAGAGC |                              |                                |
