# Supplementary material for: Network Analysis of Metabolome and Transcriptome Revealed Regulation of Different Nitrogen Concentrations on Hybrid Poplar Cambium Development
Source: MDPI journal article supplement (doi:10.3390/ijms25021017), 2024-01-13
Supplement: s1 [file s1]

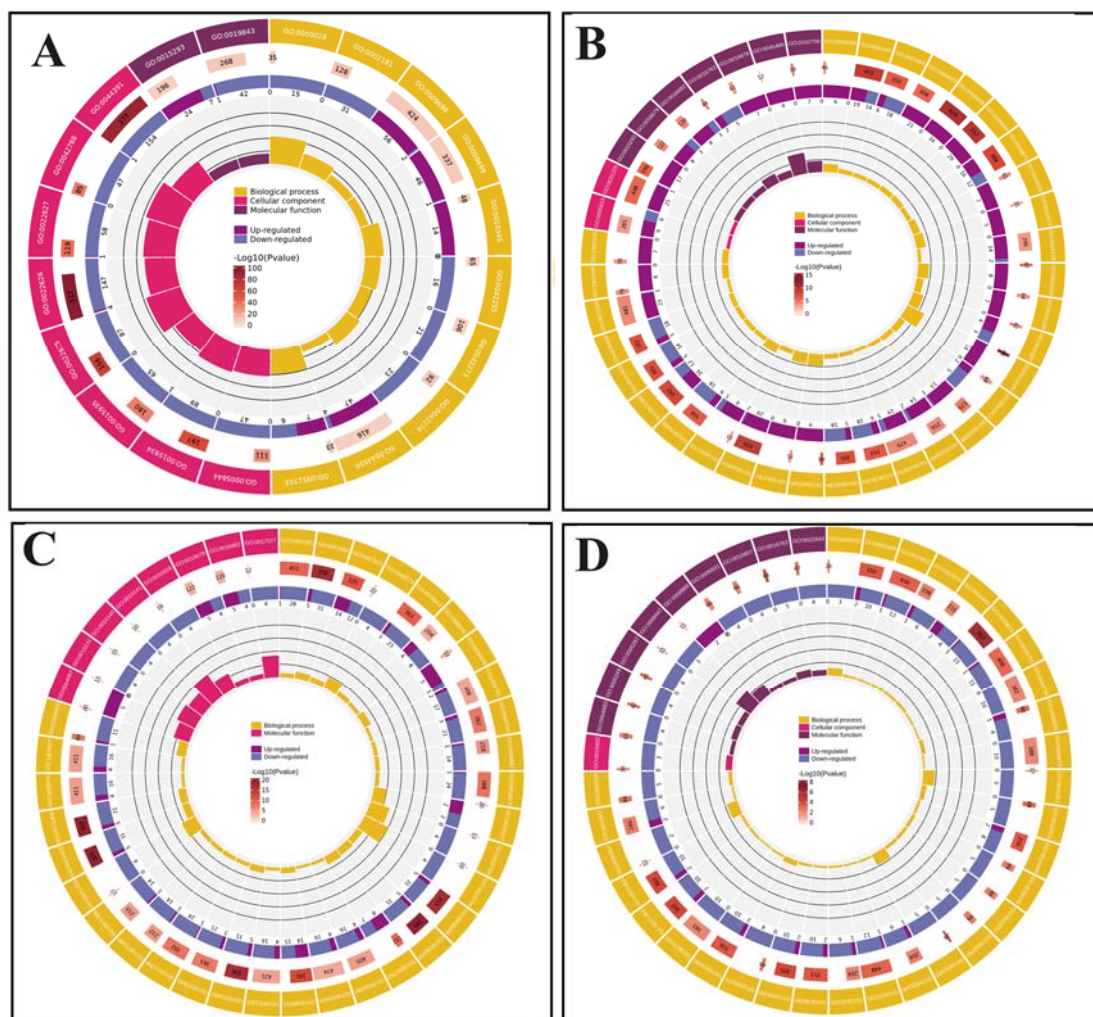

Fig.S3 GO enrichment analysis of DEGs. A. M vs L; B. M vs LM; C. M vs HM; D. M vs H DEGs GO enrichment cycle diagram. The outermost circle is ID, and the Ontology to which the ID belongs is distinguished by color; The second circle is the total number of genes in the term, represented by color -  $\log_{10}(P\text{-value})$ ; The third circle is the number of up/down-regulated genes; The fourth circle is Rich factor, and the innermost circle is legend information.
