# Supplementary material for: Network Analysis of Metabolome and Transcriptome Revealed Regulation of Different Nitrogen Concentrations on Hybrid Poplar Cambium Development
Source: MDPI journal article supplement (doi:10.3390/ijms25021017), 2024-01-13
Supplement: s1 [file s1]

**Table S2 Statistics of the data generated by the transcriptome sequencing**

| Sample | Reads    | Q30 (%) | Clean Reads | Clean Reads (%) | Mapped Reads | Mapped Reads (%) |
|--------|----------|---------|-------------|-----------------|--------------|------------------|
|        |          |         |             |                 | Reads        | (%)              |
| L1     | 72450762 | 93.45   | 66073712    | 91.20           | 57422777     | 86.91            |
| L2     | 56381628 | 93.41   | 53342500    | 94.60           | 46895904     | 87.91            |
| L3     | 63665920 | 93.60   | 59348140    | 93.22           | 51850102     | 87.37            |
| LM1    | 71196840 | 93.60   | 66226606    | 93.02           | 57819332     | 87.31            |
| LM2    | 59676280 | 93.20   | 55606620    | 93.19           | 48404720     | 87.05            |
| LM3    | 54808230 | 93.04   | 51414164    | 93.81           | 44890399     | 87.31            |
| M1     | 61149972 | 93.42   | 56830012    | 92.94           | 49361326     | 86.86            |
| M2     | 53828280 | 93.09   | 49746932    | 92.42           | 42944848     | 86.33            |
| M3     | 70223978 | 93.58   | 64041340    | 91.20           | 55648237     | 86.89            |
| HM1    | 60016574 | 93.89   | 55375358    | 92.27           | 48525787     | 87.63            |
| HM2    | 59726742 | 94.05   | 55123066    | 92.29           | 48369413     | 87.75            |
| HM3    | 53454620 | 93.29   | 49866530    | 93.29           | 43519347     | 87.27            |
| H1     | 61523686 | 93.28   | 56956508    | 92.58           | 49679777     | 87.22%           |
| H2     | 66583494 | 93.43   | 63092836    | 94.76           | 55189741     | 87.47%           |
| H3     | 59603740 | 93.30   | 55324322    | 92.82           | 48429139     | 87.54%           |
