# Supplementary material for: Network Analysis of Metabolome and Transcriptome Revealed Regulation of Different Nitrogen Concentrations on Hybrid Poplar Cambium Development
Source: MDPI journal article supplement (doi:10.3390/ijms25021017), 2024-01-13
Supplement: s1 [file s1]

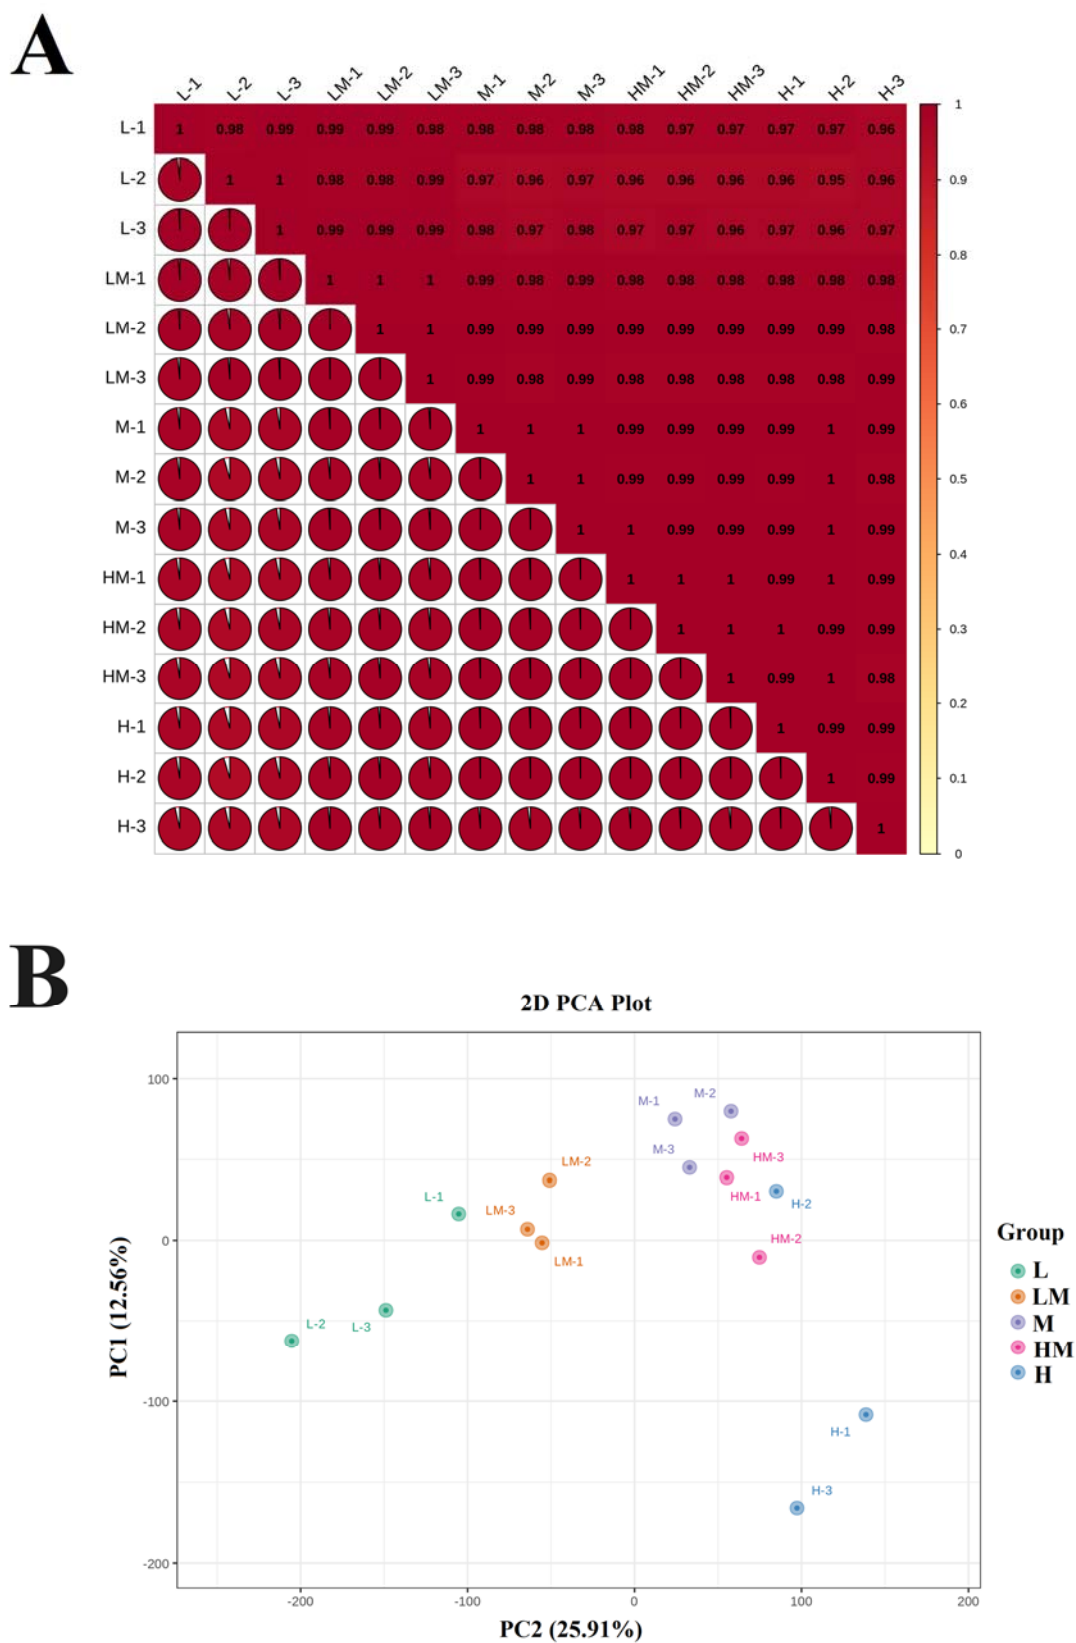

Fig S1. Transcriptome evaluation. A. Correlation analysis between samples; B. Principal component analysis between samples.
