# Supplementary material for: Network Analysis of Metabolome and Transcriptome Revealed Regulation of Different Nitrogen Concentrations on Hybrid Poplar Cambium Development
Source: MDPI journal article supplement (doi:10.3390/ijms25021017), 2024-01-13
Supplement: s1 [file s1]

**Table S1 The data of height, diameter, numbers of internode/leaves, NH<sub>4</sub><sup>+</sup>, NO<sub>3</sub><sup>-</sup>, the contents of lignin, cellulose, and hemicellulose.**

| Sample | Height (cm) | Diameter<br>(mm) | Interganglion/<br>Leaves number | Ammonium<br>nitrogen content<br>(µg/g) | nitrate nitrogen<br>concentration<br>(µg/g) | Lignin content<br>(%) | Cellulose<br>content (%) | Hemicellulose<br>content (%) |
|--------|-------------|------------------|---------------------------------|----------------------------------------|---------------------------------------------|-----------------------|--------------------------|------------------------------|
| L      | 80.5        | 4.08             | 26/25                           | 3.692588                               | 598.9481                                    | 26.84704              | 39.27273                 | 17.16421                     |
|        | 80          | 4.43             | 27/26                           | 4.056389                               | 612.0973                                    | 27.0102               | 38.24242                 | 17.12211                     |
|        | 81          | 4.46             | 26/25                           | 3.692588                               | 589.0861                                    | 27.98912              | 38.48485                 | 17.03789                     |
|        | 80          | 4.48             | 26/25                           |                                        |                                             | 26.76547              | 39.15152                 |                              |
|        | 82          | 4.57             | 24/23                           |                                        |                                             |                       | 39.75758                 |                              |
| LM     | 83          | 4.52             | 28/27                           | 7.421555                               | 1144.642                                    | 25.46023              | 40.18182                 | 16.84842                     |
|        | 82.5        | 4.53             | 26/25                           | 6.693952                               | 1144.642                                    | 26.03127              | 40.36364                 | 16.93263                     |
|        | 84          | 4.49             | 28/27                           | 6.693952                               | 1147.929                                    | 25.29708              | 40.84848                 | 16.91158                     |
|        | 85          | 4.48             | 28/27                           |                                        |                                             | 25.13392              | 39.81818                 |                              |
|        | 84.4        | 4.59             | 27/26                           |                                        |                                             |                       | 40.12121                 |                              |

|    |      |      |       |          |          |          |          |          |
|----|------|------|-------|----------|----------|----------|----------|----------|
| M  | 86.3 | 4.66 | 29/28 | 12.51478 | 1664.037 | 20.81033 | 42.36364 | 15.98526 |
|    | 86.5 | 4.68 | 29/28 | 13.33333 | 1815.253 | 21.78926 | 42.66667 | 16.23789 |
|    | 87   | 4.76 | 29/28 | 13.33333 | 1805.391 | 21.05506 | 42       | 16.42737 |
|    | 86.5 | 4.69 | 30/29 |          |          | 21.70768 | 42.42424 |          |
|    | 88   | 4.63 | 31/30 |          |          |          | 44       |          |
| HM | 90   | 4.81 | 33/32 | 16.42565 | 1969.757 | 18.85248 | 43.51515 | 15.98526 |
|    | 91   | 4.91 | 32/31 | 16.1528  | 2032.216 | 19.17879 | 43.21212 | 15.75368 |
|    | 91.5 | 4.9  | 32/31 | 15.33424 | 1927.022 | 19.26037 | 43.69697 | 15.92211 |
|    | 92   | 4.96 | 32/31 |          |          | 18.68933 | 43.09091 |          |
|    | 91   | 4.89 | 33/32 |          |          |          | 43.87879 |          |
| H  | 97   | 5.02 | 33/32 | 17.7899  | 1996.055 | 19.91298 | 46       | 15.73263 |
|    | 96   | 4.99 | 34/33 | 17.7899  | 2028.928 | 20.23929 | 45.63636 | 15.92211 |
|    | 95   | 5.05 | 34/33 | 19.42701 | 2081.525 | 19.91298 | 45.69697 | 15.62737 |
|    | 93   | 5.03 | 33/32 |          |          | 20.15772 | 45.09091 |          |
|    | 92   | 5.18 | 34/33 |          |          |          | 44.9697  |          |
