# Supplementary material for: Network Analysis of Metabolome and Transcriptome Revealed Regulation of Different Nitrogen Concentrations on Hybrid Poplar Cambium Development
Source: Int J Mol Sci. 2024 Jan 13;25(2):1017. doi: 10.3390/ijms25021017 (PMC10816006; doi:10.3390/ijms25021017)
Supplement: Supplementary file 1 [file ijms-25-01017-s001.zip]

Archive with 7 entries (7 files):
- Fig S1.pdf
- Fig S2.pdf
- Fig S3.pdf
- Fig S4.pdf
- Table S1.pdf
- Table S2.pdf
- Table S3.pdf
